# Supplementary material
Source: MDPI journal article supplement (https://www.mdpi.com/2504-477X/6/4/103)
Supplement: s1 [file s1]

**Supplementary Data:**

There are supplementary data available for the model used and summary:

Amaechi, Chiemela Victor; Wang, Chunguang (2022), "Composite CLT theory MATLAB codes", Mendeley Data, V1, doi: 10.17632/pdjytm9gzx.1

Amaechi, Chiemela Victor (2022), "Dataset on Composite Risers for Deep Water Application", Mendeley Data, V1, doi: 10.17632/4rvvwkjs27.1
